# Supplementary material for: tasiRNA-ARF Pathway Moderates Floral Architecture inArabidopsisPlants Subjected to Drought Stress
Source: Hindawi journal article supplement (doi:10.1155/2014/303451), 2014-01-01
Supplement: f1 [file 303451.f1.zip]

|       |  | normalized number |          |          |           |            |           |            |
|-------|--|-------------------|----------|----------|-----------|------------|-----------|------------|
| miRNA |  | Unstress          | dry 1-5h | dry6-10h | cold 1-5h | cold 6-10h | NaCl 1-5h | NaCl 6-10h |
| 156   |  | 0.155             | 0.108    | 0.172 *  | 0.070 *   | 0.046      | 0.230     | 0.306 *    |
| 158   |  | 0.161             | 0.099 *  | 0.207    | 0.234     | 0.306      | 0.115     | 0.097      |
| 159   |  | 0.009             | 0.022    | 0.034    | 0.005     | 0.000      | 0.000     | 0.005      |
| 160   |  | 0.039             | 0.028 *  | 0.017    | 0.014     | 0.040      | 0.000     | 0.032      |
| 163   |  | 0.005             | 0.006    | 0.000    | 0.000     | 0.006      | 0.000     | 0.005      |
| 165   |  | 0.025             | 0.061 *  | 0.000 *  | 0.005     | 0.006      | 0.023     | 0.005      |
| 166   |  | 0.054             | 0.094 *  | 0.052    | 0.033     | 0.017      | 0.046     | 0.038      |
| 167   |  | 0.012             | 0.030    | 0.000    | 0.014     | 0.017      | 0.000     | 0.038      |
| 168   |  | 0.000             | 0.000    | 0.000    | 0.005     | 0.000      | 0.000     | 0.000      |
| 169   |  | 0.034             | 0.015 *  | 0.034    | 0.023     | 0.017      | 0.046     | 0.011      |
| 171   |  | 0.006             | 0.006    | 0.000    | 0.037     | 0.000      | 0.000     | 0.016      |
| 319   |  | 0.003             | 0.000    | 0.000    | 0.000     | 0.000      | 0.000     | 0.054 *    |
| 390   |  | 0.003             | 0.003    | 0.017    | 0.005     | 0.012      | 0.000     | 0.005      |
| 393   |  | 0.072             | 0.036    | 0.017    | 0.084     | 0.139      | 0.046     | 0.011 *    |
| 396   |  | 0.046             | 0.039    | 0.069    | 0.084     | 0.087      | 0.034     | 0.000 *    |
| 400   |  | 0.019             | 0.000 *  | 0.000    | 0.019     | 0.012      | 0.069     | 0.022      |
| 403   |  | 0.005             | 0.003    | 0.000 *  | 0.037     | 0.023      | 0.011     | 0.011      |
| 408   |  | 0.005             | 0.017    | 0.017    | 0.023 *   | 0.046      | 0.023     | 0.032      |
| 822   |  | 0.019             | 0.000 *  | 0.000    | 0.005     | 0.000      | 0.000     | 0.011      |

  

| ta-si RNAs     |  | Unstress | dry 1-5h | dry 6-10h | cold 1-5h | cold 6-10h | NaCl 1-5h | NaCl 6-10h |
|----------------|--|----------|----------|-----------|-----------|------------|-----------|------------|
| TAS1 antisense |  | 0.035    | 0.026    | 0.026     | 0.058     | 0.039      | 0.017 *   | 0.032      |
| TAS2 antisense |  | 0.021    | 0.014    | 0.013 *   | 0.011 *   | 0.022      | 0.009 *   | 0.000 *    |
| TAS3 antisense |  | 0.012    | 0.004 *  | 0.000 *   | 0.023     | 0.022      | 0.000 *   | 0.004 *    |
