# Supplementary figures and images for: tasiRNA-ARF Pathway Moderates Floral Architecture inArabidopsisPlants Subjected to Drought Stress
Source: Hindawi journal article supplement (doi:10.1155/2014/303451), 2014-01-01

(a)

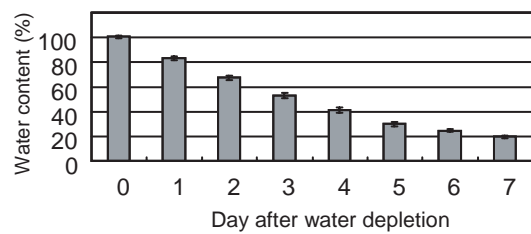

(b)

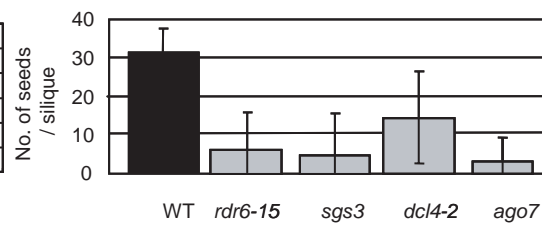

(c)

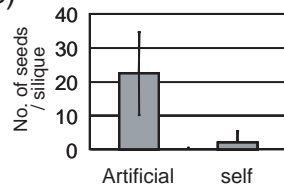

(d)

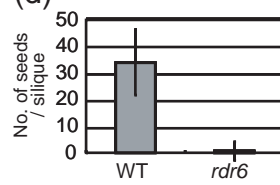

(e)

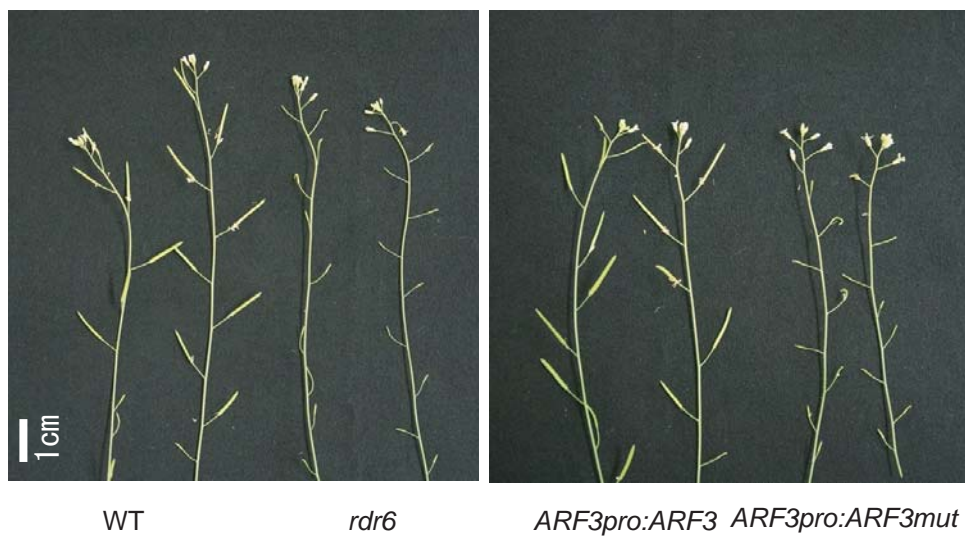

(f)

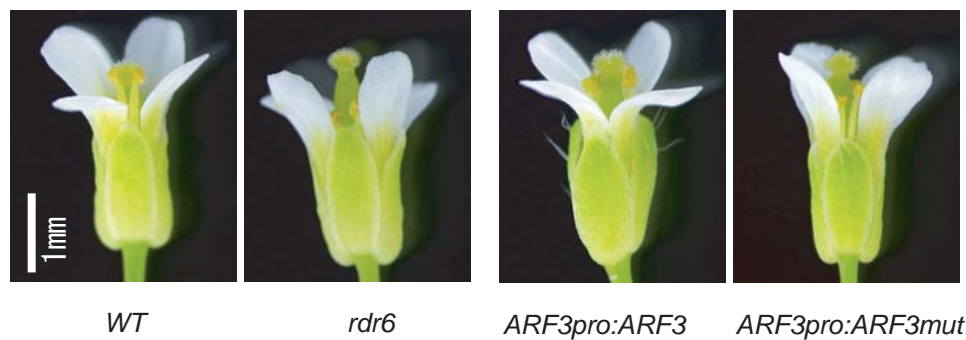

Supplement: f1 [file 303451.f1.zip]

(a) Water deprivation response-related genes  
(GO:0009414)

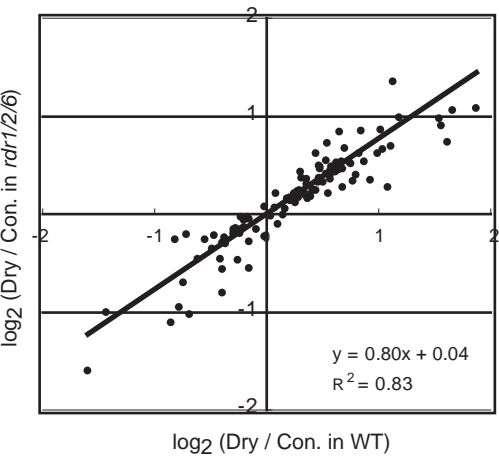

(b) Expression of YUCCA genes

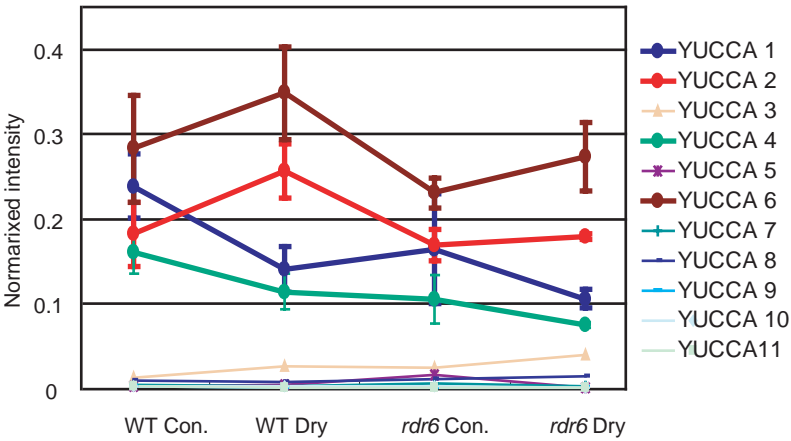

Supplement: f1 [file 303451.f1.zip]

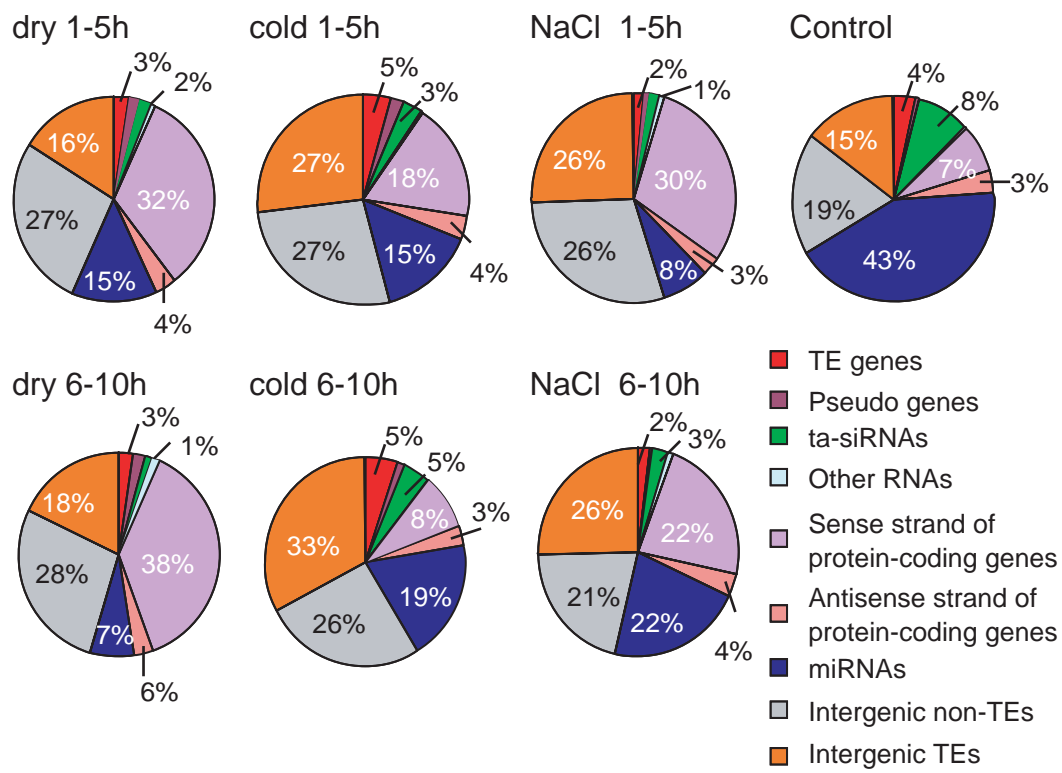

Supplement: f1 [file 303451.f1.zip]
